# Supplementary material
Source: MDPI journal article supplement (https://www.mdpi.com/2227-9091/11/10/171)
Supplement: s1 [file s1]

## Supplementary Materials: Documentation of EB and EUC Programs

The US Department of Labor publishes reports titled “Extended Benefits Trigger Notice” and “Emergency Unemployment Compensation Trigger Notice.” The Extended Benefits Trigger Notice reports whether a state has triggered on extended benefits and when the extended-benefits-period began. The Emergency Unemployment Compensation Trigger Notice reports whether different tiers of the Emergency Unemployment Compensation program were active.

Background on the Emergency Unemployment Compensation program enacted in June 2008 is provided by [Fujita \(2010\)](#), [Rothstein \(2011\)](#), and [Whittaker and Isaacs \(2014\)](#).

These reports are accessible through the Unemployment Insurance Data dashboard (<https://oui.doleta.gov/unemploy/DataDashboard.asp>, accessed on 27 September 2023) by clicking on “Weekly Claims and Trigger Notice Archives,” which brings up [https://oui.doleta.gov/unemploy/claims\\_arch.asp](https://oui.doleta.gov/unemploy/claims_arch.asp), accessed on 27 September 2023.

Trigger Notice Report

[https://oui.doleta.gov/unemploy/trigger/2010/trig\\_010310.html](https://oui.doleta.gov/unemploy/trigger/2010/trig_010310.html)

**TRIGGER NOTICE NO. 2009 - 51**  
**STATE EXTENDED BENEFIT (E.B.) INDICATORS UNDER P.L. 102-318**  
**Effective January 03, 2010**

|   |   |                 | INDICATORS                                  |                                |                            |                  |                |                    | STATUS        |             |
|---|---|-----------------|---------------------------------------------|--------------------------------|----------------------------|------------------|----------------|--------------------|---------------|-------------|
|   |   |                 | 13 Weeks<br>Insured<br>Unemployment<br>Rate | Percent<br>of Prior<br>2 Years | 3 months<br>S.A.<br>T.U.R. | Percent of prior |                |                    | Periods       |             |
|   |   |                 |                                             |                                |                            | Year             | Second<br>Year | Available<br>Weeks | Begin Date(B) | End Date(E) |
| @ |   | Alabama         | 3.39                                        | 176                            | 10.7                       | 184              | 297            | 20                 | B 03-29-2009  |             |
| @ |   | Alaska          | 5.30                                        | 154                            | 8.6                        | 126              | 136            | 20                 | B 01-25-2009  |             |
| @ |   | Arizona         | 3.83                                        | 229                            | 9.1                        | 146              | 227            | 20                 | B 02-22-2009  |             |
|   | & | Arkansas        | 4.70                                        | 156                            | 7.4                        | 137              | 145            |                    | E 09-26-2009  |             |
| @ |   | California      | 4.85                                        | 160                            | 12.4                       | 153              | 217            | 20                 | B 02-22-2009  |             |
| @ |   | Colorado        | 3.05                                        | 243                            | 7.0                        | 134              | 170            | 13                 | B 04-12-2009  |             |
| @ |   | Connecticut     | 4.20                                        | 163                            | 8.5                        | 139              | 177            | 20                 | B 02-15-2009  |             |
| @ | * | Delaware        | 3.19                                        | 141                            | 8.5                        | 157              | 236            | 20                 | B 06-28-2009  |             |
| @ |   | District of Col | 1.50                                        | 151                            | 11.7                       | 151              | 208            | 20                 | B 04-05-2009  |             |
|   | * | &               | Florida                                     | 3.63                           | 166                        | 11.3             | 163            | 251                | E 01-02-2010  |             |
| @ | * |                 | Georgia                                     | 3.77                           | 182                        | 10.1             | 146            | 210                | B 02-22-2009  |             |
|   |   | &               | Hawaii                                      | 3.39                           | 179                        | 7.1              | 154            | 253                | E 01-24-1981  |             |
| @ |   | Idaho           | 4.30                                        | 160                            | 9.0                        | 160              | 272            | 20                 | B 02-08-2009  |             |
| @ |   | Illinois        | 4.13                                        | 168                            | 10.8                       | 158              | 200            | 20                 | B 03-15-2009  |             |
| @ |   | Indiana         | 3.26                                        | 136                            | 9.7                        | 149              | 210            | 20                 | B 03-15-2009  |             |
|   | * | &               | Iowa                                        | 2.98                           | 177                        | 6.7              | 155            | 176                | E 06-04-1983  |             |
| @ |   | Kansas          | 3.31                                        | 210                            | 6.6                        | 140              | 165            | 13                 | B 07-05-2009  |             |
| @ | * |                 | Kentucky                                    | 3.13                           | 150                        | 10.9             | 155            | 201                | B 02-22-2009  |             |
|   |   | &               | Louisiana                                   | 3.33                           | 238                        | 7.2              | 130            | 200                | E 02-25-2006  |             |
| @ |   | Maine           | 2.84                                        | 162                            | 8.2                        | 141              | 170            | 20                 | B 03-29-2009  |             |
|   |   | &               | Maryland                                    | 3.13                           | 169                        | 7.3              | 148            | 202                | E 07-31-1982  |             |
| @ | * |                 | Massachusetts                               | 3.82                           | 143                        | 9.0              | 155            | 204                | B 03-22-2009  |             |
| @ |   | Michigan        | 4.83                                        | 137                            | 15.0                       | 163              | 205            | 20                 | B 01-25-2009  |             |
| @ |   | Minnesota       | 3.34                                        | 172                            | 7.5                        | 131              | 159            | 13                 | B 03-29-2009  |             |
|   |   | &               | Mississippi                                 | 3.54                           | 166                        | 9.5              | 128            | 153                | E 07-16-1983  |             |
|   |   | &               | Missouri                                    | 3.45                           | 168                        | 9.4              | 144            | 174                | E 01-02-2010  |             |
|   |   | &               | Montana                                     | 4.09                           | 205                        | 6.5              | 135            | 180                | E 07-18-2009  |             |
|   |   | &               | Nebraska                                    | 2.03                           | 184                        | 4.8              | 133            | 154                | E 01-24-1981  |             |
| @ |   | Nevada          | 5.27                                        | 173                            | 12.9                       | 167              | 258            | 20                 | B 02-22-2009  |             |
| @ | * |                 | New Hampshire                               | 2.71                           | 196                        | 6.9              | 172            | 202                | B 08-02-2009  |             |
| @ |   | New Jersey      | 4.32                                        | 140                            | 9.7                        | 161              | 225            | 20                 | B 03-15-2009  |             |
| @ |   | New Mexico      | 3.18                                        | 189                            | 7.8                        | 173              | 222            | 13                 | B 09-06-2009  |             |
| @ |   | New York        | 3.53                                        | 154                            | 8.8                        | 146              | 191            | 20                 | B 03-29-2009  |             |
| @ |   | North Carolina  | 4.67                                        | 176                            | 10.8                       | 152              | 220            | 20                 | B 10-05-2008  |             |
|   | * | &               | North Dakota                                | 1.33                           | 156                        | 4.2              | 127            | 135                | E 06-11-1983  |             |
| @ |   | Ohio            | 3.43                                        | 158                            | 10.4                       | 150              | 182            | 20                 | B 03-15-2009  |             |
|   |   | &               | Oklahoma                                    | 2.73                           | 245                        | 7.0              | 166            | 179                | E 01-24-1981  |             |
| @ |   | Oregon          | 5.65                                        | 163                            | 11.2                       | 153              | 211            | 20                 | B 12-07-2008  |             |
| @ |   | Pennsylvania    | 5.04                                        | 159                            | 8.7                        | 150              | 193            | 20                 | B 02-15-2009  |             |
| # |   | &               | Puerto Rico                                 | 6.22                           | 160                        | 15.9             | 129            | 140                | B 01-25-2009  |             |
| @ |   | Rhode Island    | 3.78                                        | 132                            | 12.9                       | 146              | 230            | 20                 | B 07-06-2008  |             |
| @ |   | South Carolina  | 4.53                                        | 155                            | 12.0                       | 153              | 214            | 20                 | B 03-08-2009  |             |
|   | * | &               | South Dakota                                | 1.25                           | 231                        | 4.9              | 148            | 175                | E 01-24-1981  |             |
| @ |   | Tennessee       | 2.86                                        | 162                            | 10.4                       | 148              | 200            | 20                 | B 02-22-2009  |             |
| @ |   | Texas           | 2.51                                        | 198                            | 8.2                        | 154              | 186            | 20                 | B 05-03-2009  |             |
|   | * | &               | Utah                                        | 2.74                           | 220                        | 6.3              | 180            | 217                | E 06-25-1983  |             |
| @ |   | Vermont         | 3.40                                        | 151                            | 6.5                        | 130              | 162            | 13                 | B 03-22-2009  |             |
|   |   | &               | Virgin Islands                              | 2.78                           | 144                        | 8.0              | 119            | 166                | E 08-06-1983  |             |
| @ |   | Virginia        | 2.02                                        | 176                            | 6.6                        | 153              | 206            | 13                 | B 05-03-2009  |             |
| @ | * |                 | Washington                                  | 4.71                           | 202                        | 9.2              | 158            | 200                | B 02-15-2009  |             |
| @ |   | West Virginia   | 3.55                                        | 185                            | 8.6                        | 200              | 195            | 20                 | B 06-07-2009  |             |

## Trigger Notice Report

[https://oui.doleta.gov/unemploy/trigger/2010/trig\\_010310.html](https://oui.doleta.gov/unemploy/trigger/2010/trig_010310.html)

|   |   |   |                  |      |     |     |     |     |    |              |
|---|---|---|------------------|------|-----|-----|-----|-----|----|--------------|
| @ |   |   | <b>Wisconsin</b> | 5.10 | 178 | 8.3 | 166 | 180 | 20 | B 02-22-2009 |
|   | * | & | <b>Wyoming</b>   | 2.83 | 293 | 7.1 | 221 | 253 |    | E 06-13-1987 |

---

Total Number "ON": 37 1 36

---

\* - State does not have 6 % I.U.R option in law

& - State does not have T.U.R option in law

December 31, 2009

@ - State "ON" by 3-month average TUR

# - State "ON" by 13-week IUR

I.U.R reflects 13-week period ending December 19, 2009

T.U.R reflects avg. seasonally adjusted T.U.R for 3-month period ending November, 2009

EUC 2008 TRIGGER NOTICE NO. 2009 - 51  
THIRD AND FOURTH TIER EUC 2008 TRIGGERS UNDER P.L. 111-92 Effective January 3, 2010

| State                   | 13 Weeks<br>IUR | 3 months<br>SA TUR | Tier Three<br>Status | Tier Three<br>Effective<br>Date | Tier Four<br>Status | Tier Four<br>Effective<br>Date |
|-------------------------|-----------------|--------------------|----------------------|---------------------------------|---------------------|--------------------------------|
| Alabama                 | 3.39            | 10.7               | ON                   | 11/8/2009                       | ON                  | 11/8/2009                      |
| Alaska                  | 5.30            | 8.6                | ON                   | 11/8/2009                       | ON                  | 1/3/2010                       |
| Arizona                 | 3.83            | 9.1                | ON                   | 11/8/2009                       | ON                  | 11/8/2009                      |
| Arkansas                | 4.70            | 7.4                | ON                   | 11/8/2009                       |                     |                                |
| California              | 4.85            | 12.4               | ON                   | 11/8/2009                       | ON                  | 11/8/2009                      |
| Colorado                | 3.05            | 7.0                | ON                   | 11/8/2009                       |                     |                                |
| Connecticut             | 4.20            | 8.5                | ON                   | 11/8/2009                       | ON                  | 1/3/2010                       |
| Delaware                | 3.19            | 8.5                | ON                   | 11/8/2009                       | ON                  | 1/3/2010                       |
| District of<br>Columbia | 1.50            | 11.7               | ON                   | 11/8/2009                       | ON                  | 11/8/2009                      |
| Florida                 | 3.63            | 11.3               | ON                   | 11/8/2009                       | ON                  | 11/8/2009                      |
| Georgia                 | 3.77            | 10.1               | ON                   | 11/8/2009                       | ON                  | 11/8/2009                      |
| Hawaii                  | 3.39            | 7.1                | ON                   | 11/8/2009                       |                     |                                |
| Idaho                   | 4.30            | 9.0                | ON                   | 11/8/2009                       | ON                  | 11/8/2009                      |
| Illinois                | 4.13            | 10.8               | ON                   | 11/8/2009                       | ON                  | 11/8/2009                      |
| Indiana                 | 3.26            | 9.7                | ON                   | 11/8/2009                       | ON                  | 11/8/2009                      |
| Iowa                    | 2.98            | 6.7                | ON                   | 11/8/2009                       |                     |                                |
| Kansas                  | 3.31            | 6.6                | ON                   | 11/8/2009                       |                     |                                |
| Kentucky                | 3.13            | 10.9               | ON                   | 11/8/2009                       | ON                  | 11/8/2009                      |
| Louisiana               | 3.33            | 7.2                | ON                   | 11/8/2009                       |                     |                                |
| Maine                   | 2.84            | 8.2                | ON                   | 11/8/2009                       | OFF                 | 1/2/2010                       |
| Maryland                | 3.13            | 7.3                | ON                   | 11/8/2009                       |                     |                                |
| Massachusetts           | 3.82            | 9.0                | ON                   | 11/8/2009                       | ON                  | 11/8/2009                      |
| Michigan                | 4.83            | 15.0               | ON                   | 11/8/2009                       | ON                  | 11/8/2009                      |
| Minnesota               | 3.34            | 7.5                | ON                   | 11/8/2009                       |                     |                                |
| Mississippi             | 3.54            | 9.5                | ON                   | 11/8/2009                       | ON                  | 11/8/2009                      |
| Missouri                | 3.45            | 9.4                | ON                   | 11/8/2009                       | ON                  | 11/8/2009                      |
| Montana                 | 4.09            | 6.5                | ON                   | 11/8/2009                       |                     |                                |
| Nebraska                | 2.03            | 4.8                |                      |                                 |                     |                                |
| Nevada                  | 5.27            | 12.9               | ON                   | 11/8/2009                       | ON                  | 11/8/2009                      |
| New Hampshire           | 2.71            | 6.9                | ON                   | 11/8/2009                       |                     |                                |
| New Jersey              | 4.32            | 9.7                | ON                   | 11/8/2009                       | ON                  | 11/8/2009                      |
| New Mexico              | 3.18            | 7.8                | ON                   | 11/8/2009                       |                     |                                |
| New York                | 3.53            | 8.8                | ON                   | 11/8/2009                       | ON                  | 11/8/2009                      |
| North Carolina          | 4.67            | 10.8               | ON                   | 11/8/2009                       | ON                  | 11/8/2009                      |
| North Dakota            | 1.33            | 4.2                |                      |                                 |                     |                                |
| Ohio                    | 3.43            | 10.4               | ON                   | 11/8/2009                       | ON                  | 11/8/2009                      |

## Emergency Unemployment Compensation Trigger Notice Report

[https://oui.doleta.gov/unemploy/euc\\_trigger/2010/euc\\_010310.html](https://oui.doleta.gov/unemploy/euc_trigger/2010/euc_010310.html)

|                       |      |      |    |           |          |           |
|-----------------------|------|------|----|-----------|----------|-----------|
| <b>Oklahoma</b>       | 2.73 | 7.0  | ON | 11/8/2009 |          |           |
| <b>Oregon</b>         | 5.65 | 11.2 | ON | 11/8/2009 | ON       | 11/8/2009 |
| <b>Pennsylvania</b>   | 5.04 | 8.7  | ON | 11/8/2009 | ON       | 11/8/2009 |
| <b>Puerto Rico</b>    | 6.22 | 15.9 | ON | 11/8/2009 | ON       | 11/8/2009 |
| <b>Rhode Island</b>   | 3.78 | 12.9 | ON | 11/8/2009 | ON       | 11/8/2009 |
| <b>South Carolina</b> | 4.53 | 12.0 | ON | 11/8/2009 | ON       | 11/8/2009 |
| <b>South Dakota</b>   | 1.25 | 4.9  |    |           |          |           |
| <b>Tennessee</b>      | 2.86 | 10.4 | ON | 11/8/2009 | ON       | 11/8/2009 |
| <b>Texas</b>          | 2.51 | 8.2  | ON | 11/8/2009 |          |           |
| <b>Utah</b>           | 2.74 | 6.3  | ON | 11/8/2009 |          |           |
| <b>Vermont</b>        | 3.40 | 6.5  | ON | 11/8/2009 |          |           |
| <b>Virgin Islands</b> | 2.78 | 8.0  | ON | 11/8/2009 |          |           |
| <b>Virginia</b>       | 2.02 | 6.6  | ON | 11/8/2009 |          |           |
| <b>Washington</b>     | 4.71 | 9.2  | ON | 11/8/2009 | ON       | 11/8/2009 |
| <b>West Virginia</b>  | 3.55 | 8.6  | ON | 11/8/2009 | ON       | 11/8/2009 |
| <b>Wisconsin</b>      | 5.10 | 8.3  | ON | 11/8/2009 | WILL END | 1/9/2010  |
| <b>Wyoming</b>        | 2.83 | 7.1  | ON | 11/8/2009 |          |           |

All states are eligible for up to 34 weeks of First and Second Tier benefits.

50 states are eligible for up to 13 weeks of Third Tier benefits as of January 3, 2010.

31 states are eligible for up to 6 weeks of Fourth Tier benefits as of January 3, 2010.

I.U.R reflects 13-week period ending December 19, 2009.

T.U.R reflects avg. seasonally adjusted T.U.R for 3-month period ending November, 2009.

\* The effective date represents when states could begin making payments to claimants, and not when the state met trigger criteria to be "on" in any tier of benefits.

Trigger Notice Report

[https://oui.doleta.gov/unemploy/trigger/2010/trig\\_062710.html](https://oui.doleta.gov/unemploy/trigger/2010/trig_062710.html)

TRIGGER NOTICE NO. 2010 - 24  
STATE EXTENDED BENEFIT (E.B.) INDICATORS UNDER P.L. 102-318  
Effective June 27, 2010

|   |   |                 | INDICATORS                                  |                                |                            |                  |                | STATUS             |                              |
|---|---|-----------------|---------------------------------------------|--------------------------------|----------------------------|------------------|----------------|--------------------|------------------------------|
|   |   |                 | 13 Weeks<br>Insured<br>Unemployment<br>Rate | Percent<br>of Prior<br>2 Years | 3 months<br>S.A.<br>T.U.R. | Percent of prior |                |                    | Periods                      |
|   |   |                 |                                             |                                |                            | Year             | Second<br>Year | Available<br>Weeks | Begin Date(B)<br>End Date(E) |
| @ | & | Alabama         | 2.76                                        | 97                             | 10.9                       | 113              | 247            |                    | E 06-05-2010                 |
|   |   | Alaska          | 6.12                                        | 131                            | 8.4                        | 109              | 133            | 20                 | B 01-25-2009                 |
|   | & | Arizona         | 3.36                                        | 120                            | 9.6                        | 107              | 192            |                    | E 06-12-2010                 |
|   | & | Arkansas        | 3.84                                        | 97                             | 7.8                        | 109              | 162            |                    | E 09-26-2009                 |
|   | & | California      | 4.73                                        | 111                            | 12.5                       | 114              | 195            |                    | E 06-12-2010                 |
| @ | & | Colorado        | 3.24                                        | 142                            | 8.0                        | 100              | 181            |                    | E 06-05-2010                 |
|   |   | Connecticut     | 4.35                                        | 114                            | 9.0                        | 112              | 176            | 20                 | B 02-15-2009                 |
|   | & | Delaware        | 3.20                                        | 106                            | 9.0                        | 115              | 214            |                    | E 06-05-2010                 |
|   | & | District of Col | 2.69                                        | 230                            | 11.0                       | 117              | 186            |                    | E 06-12-2010                 |
|   | & | Florida         | 3.22                                        | 110                            | 12.0                       | 121              | 218            |                    | E 06-05-2010                 |
|   | & | Georgia         | 2.88                                        | 101                            | 10.3                       | 111              | 187            |                    | E 06-12-2010                 |
|   | & | Hawaii          | 3.14                                        | 119                            | 6.7                        | 98               | 197            |                    | E 01-24-1981                 |
|   | & | Idaho           | 4.43                                        | 105                            | 9.2                        | 124              | 219            |                    | E 06-05-2010                 |
|   | & | Illinois        | 4.01                                        | 100                            | 11.2                       | 116              | 189            |                    | E 06-05-2010                 |
|   | & | Indiana         | 2.90                                        | 79                             | 10.0                       | 96               | 196            |                    | E 06-05-2010                 |
| @ | * | Iowa            | 2.79                                        | 100                            | 6.8                        | 121              | 170            |                    | E 06-04-1983                 |
|   |   | Kansas          | 2.87                                        | 108                            | 6.5                        | 97               | 162            | 13                 | B 07-05-2009                 |
|   | & | Kentucky        | 3.02                                        | 91                             | 10.6                       | 101              | 179            |                    | E 06-05-2010                 |
|   | & | Louisiana       | 3.10                                        | 161                            | 6.8                        | 104              | 178            |                    | E 02-25-2006                 |
|   | & | Maine           | 3.42                                        | 107                            | 8.1                        | 100              | 168            |                    | E 06-12-2010                 |
| @ | & | Maryland        | 3.00                                        | 110                            | 7.5                        | 108              | 197            |                    | E 07-31-1982                 |
|   | & | Massachusetts   | 3.77                                        | 97                             | 9.2                        | 115              | 195            | 0                  | E 06-26-2010                 |
|   | * | Michigan        | 4.42                                        | 79                             | 13.9                       | 106              | 187            | 20                 | B 01-25-2009                 |
|   | @ | Minnesota       | 3.29                                        | 102                            | 7.2                        | 86               | 144            | 13                 | B 03-29-2009                 |
|   | & | Mississippi     | 3.40                                        | 111                            | 11.5                       | 126              | 182            |                    | E 07-16-1983                 |
| @ | & | Missouri        | 3.20                                        | 105                            | 9.4                        | 103              | 170            |                    | E 06-05-2010                 |
|   | & | Montana         | 4.48                                        | 120                            | 7.2                        | 122              | 171            |                    | E 06-19-2010                 |
|   | & | Nebraska        | 2.06                                        | 124                            | 5.0                        | 108              | 166            |                    | E 01-24-1981                 |
|   | & | Nevada          | 4.96                                        | 110                            | 13.7                       | 124              | 244            |                    | E 06-12-2010                 |
|   | * | New Hampshire   | 3.31                                        | 118                            | 6.7                        | 111              | 186            | 13                 | B 08-02-2009                 |
| @ |   | New Jersey      | 4.26                                        | 101                            | 9.8                        | 111              | 200            | 20                 | B 03-15-2009                 |
| @ |   | New Mexico      | 3.60                                        | 132                            | 8.6                        | 130              | 215            | 20                 | B 09-06-2009                 |
| @ | & | New York        | 3.46                                        | 104                            | 8.5                        | 104              | 177            |                    | E 06-05-2010                 |
|   |   | North Carolina  | 4.52                                        | 117                            | 10.8                       | 101              | 200            | 20                 | B 10-05-2008                 |
|   | * | North Dakota    | 1.48                                        | 99                             | 3.8                        | 86               | 131            |                    | E 06-11-1983                 |
|   | & | Ohio            | 3.20                                        | 88                             | 10.9                       | 109              | 181            |                    | E 06-05-2010                 |
|   | & | Oklahoma        | 2.37                                        | 120                            | 6.7                        | 109              | 203            |                    | E 01-24-1981                 |
| @ |   | Oregon          | 5.57                                        | 105                            | 10.6                       | 92               | 192            | 20                 | B 12-07-2008                 |
| # | & | Pennsylvania    | 4.84                                        | 102                            | 9.1                        | 116              | 185            |                    | E 06-05-2010                 |
|   | & | Puerto Rico     | 6.15                                        | 117                            | 16.8                       | 112              | 161            | 13                 | B 01-25-2009                 |
|   | @ | Rhode Island    | 4.28                                        | 98                             | 12.4                       | 119              | 179            | 20                 | B 07-06-2008                 |
|   | & | South Carolina  | 4.11                                        | 106                            | 11.6                       | 100              | 200            |                    | E 06-05-2010                 |
|   | * | South Dakota    | 1.23                                        | 111                            | 4.7                        | 95               | 167            |                    | E 01-24-1981                 |
| @ | & | Tennessee       | 2.67                                        | 92                             | 10.5                       | 100              | 175            |                    | E 06-05-2010                 |
|   | & | Texas           | 2.17                                        | 109                            | 8.3                        | 113              | 184            |                    | E 06-05-2010                 |
|   | * | Utah            | 2.83                                        | 124                            | 7.3                        | 110              | 221            |                    | E 06-25-1983                 |
|   |   | Vermont         | 4.01                                        | 99                             | 6.4                        | 88               | 152            | 13                 | B 03-22-2009                 |
|   | & | Virgin Islands  | 1.85                                        | 86                             | 5.2                        | 100              | 152            |                    | E 08-06-1983                 |
| @ | & | Virginia        | 1.86                                        | 110                            | 7.2                        | 109              | 205            |                    | E 06-12-2010                 |
|   |   | Washington      | 4.23                                        | 117                            | 9.3                        | 105              | 193            | 20                 | B 02-15-2009                 |
|   | & | West Virginia   | 3.24                                        | 104                            | 9.2                        | 124              | 230            |                    | E 06-05-2010                 |

## Trigger Notice Report

[https://oui.doleta.gov/unemploy/trigger/2010/trig\\_062710.html](https://oui.doleta.gov/unemploy/trigger/2010/trig_062710.html)

|   |   |           |      |     |     |     |     |              |
|---|---|-----------|------|-----|-----|-----|-----|--------------|
|   | & | Wisconsin | 4.79 | 104 | 8.5 | 98  | 197 | E 06-12-2010 |
| * | & | Wyoming   | 2.89 | 129 | 7.1 | 126 | 253 | E 06-13-1987 |

---

|                       |   |    |
|-----------------------|---|----|
| Total Number 'ON': 14 | 1 | 13 |
|-----------------------|---|----|

---

\* - State does not have 6 % I.U.R option in law

&amp; - State does not have T.U.R option in law

6/24/2010

@ - State "ON" by 3-month average T.U.R

# - State "ON" by 13-week I.U.R

IUR reflects 13-week period ending June 12, 2010

TUR reflects avg. seasonally adjusted TUR for 3-month period ending May, 2010

Emergency Unemployment Compensation Trigger Notice Report

[https://oui.doleta.gov/unemploy/euc\\_trigger/2010/euc\\_062710.html](https://oui.doleta.gov/unemploy/euc_trigger/2010/euc_062710.html)

EUC 2008 TRIGGER NOTICE NO. 2010 - 24  
THIRD AND FOURTH TIER EUC 2008 TRIGGERS UNDER P.L. 111-92  
Effective June 27, 2010

| State                   | 13 Weeks<br>IUR | 3 months<br>SA TUR | Tier Three<br>Status | Tier Three<br>Effective<br>Date | Tier Four<br>Status | Tier Four<br>Effective<br>Date |
|-------------------------|-----------------|--------------------|----------------------|---------------------------------|---------------------|--------------------------------|
| Alabama                 | 2.76            | 10.9               | OFF                  | 5/29/2010                       | OFF                 | 5/29/2010                      |
| Alaska                  | 6.12            | 8.4                | OFF                  | 5/29/2010                       | OFF                 | 5/29/2010                      |
| Arizona                 | 3.36            | 9.6                | OFF                  | 5/29/2010                       | OFF                 | 5/29/2010                      |
| Arkansas                | 3.84            | 7.8                | OFF                  | 5/29/2010                       | OFF                 | 5/29/2010                      |
| California              | 4.73            | 12.5               | OFF                  | 5/29/2010                       | OFF                 | 5/29/2010                      |
| Colorado                | 3.24            | 8.0                | OFF                  | 5/29/2010                       | OFF                 | 5/29/2010                      |
| Connecticut             | 4.35            | 9.0                | OFF                  | 5/29/2010                       | OFF                 | 5/29/2010                      |
| Delaware                | 3.20            | 9.0                | OFF                  | 5/29/2010                       | OFF                 | 5/29/2010                      |
| District of<br>Columbia | 2.69            | 11.0               | OFF                  | 5/29/2010                       | OFF                 | 5/29/2010                      |
| Florida                 | 3.22            | 12.0               | OFF                  | 5/29/2010                       | OFF                 | 5/29/2010                      |
| Georgia                 | 2.88            | 10.3               | OFF                  | 5/29/2010                       | OFF                 | 5/29/2010                      |
| Hawaii                  | 3.14            | 6.7                | OFF                  | 5/29/2010                       | OFF                 | 5/29/2010                      |
| Idaho                   | 4.43            | 9.2                | OFF                  | 5/29/2010                       | OFF                 | 5/29/2010                      |
| Illinois                | 4.01            | 11.2               | OFF                  | 5/29/2010                       | OFF                 | 5/29/2010                      |
| Indiana                 | 2.90            | 10.0               | OFF                  | 5/29/2010                       | OFF                 | 5/29/2010                      |
| Iowa                    | 2.79            | 6.8                | OFF                  | 5/29/2010                       | OFF                 | 5/29/2010                      |
| Kansas                  | 2.87            | 6.5                | OFF                  | 5/29/2010                       | OFF                 | 5/29/2010                      |
| Kentucky                | 3.02            | 10.6               | OFF                  | 5/29/2010                       | OFF                 | 5/29/2010                      |
| Louisiana               | 3.10            | 6.8                | OFF                  | 5/29/2010                       | OFF                 | 5/29/2010                      |
| Maine                   | 3.42            | 8.1                | OFF                  | 5/29/2010                       | OFF                 | 5/29/2010                      |
| Maryland                | 3.00            | 7.5                | OFF                  | 5/29/2010                       | OFF                 | 5/29/2010                      |
| Massachusetts           | 3.77            | 9.2                | OFF                  | 5/29/2010                       | OFF                 | 5/29/2010                      |
| Michigan                | 4.42            | 13.9               | OFF                  | 5/29/2010                       | OFF                 | 5/29/2010                      |
| Minnesota               | 3.29            | 7.2                | OFF                  | 5/29/2010                       | OFF                 | 5/29/2010                      |
| Mississippi             | 3.40            | 11.5               | OFF                  | 5/29/2010                       | OFF                 | 5/29/2010                      |
| Missouri                | 3.20            | 9.4                | OFF                  | 5/29/2010                       | OFF                 | 5/29/2010                      |
| Montana                 | 4.48            | 7.2                | OFF                  | 5/29/2010                       | OFF                 | 5/29/2010                      |
| Nebraska                | 2.06            | 5.0                | OFF                  | 5/29/2010                       | OFF                 | 5/29/2010                      |
| Nevada                  | 4.96            | 13.7               | OFF                  | 5/29/2010                       | OFF                 | 5/29/2010                      |
| New Hampshire           | 3.31            | 6.7                | OFF                  | 5/29/2010                       | OFF                 | 5/29/2010                      |
| New Jersey              | 4.26            | 9.8                | OFF                  | 5/29/2010                       | OFF                 | 5/29/2010                      |
| New Mexico              | 3.60            | 8.6                | OFF                  | 5/29/2010                       | OFF                 | 5/29/2010                      |
| New York                | 3.46            | 8.5                | OFF                  | 5/29/2010                       | OFF                 | 5/29/2010                      |
| North Carolina          | 4.52            | 10.8               | OFF                  | 5/29/2010                       | OFF                 | 5/29/2010                      |
| North Dakota            | 1.48            | 3.8                | OFF                  | 5/29/2010                       | OFF                 | 5/29/2010                      |

## Emergency Unemployment Compensation Trigger Notice Report

[https://oui.doleta.gov/unemploy/euc\\_trigger/2010/euc\\_062710.html](https://oui.doleta.gov/unemploy/euc_trigger/2010/euc_062710.html)

|                       |      |      |     |           |     |           |
|-----------------------|------|------|-----|-----------|-----|-----------|
| <b>Ohio</b>           | 3.20 | 10.9 | OFF | 5/29/2010 | OFF | 5/29/2010 |
| <b>Oklahoma</b>       | 2.37 | 6.7  | OFF | 5/29/2010 | OFF | 5/29/2010 |
| <b>Oregon</b>         | 5.57 | 10.6 | OFF | 5/29/2010 | OFF | 5/29/2010 |
| <b>Pennsylvania</b>   | 4.84 | 9.1  | OFF | 5/29/2010 | OFF | 5/29/2010 |
| <b>Puerto Rico</b>    | 6.15 | 16.8 | OFF | 5/29/2010 | OFF | 5/29/2010 |
| <b>Rhode Island</b>   | 4.28 | 12.4 | OFF | 5/29/2010 | OFF | 5/29/2010 |
| <b>South Carolina</b> | 4.11 | 11.6 | OFF | 5/29/2010 | OFF | 5/29/2010 |
| <b>South Dakota</b>   | 1.23 | 4.7  | OFF | 5/29/2010 | OFF | 5/29/2010 |
| <b>Tennessee</b>      | 2.67 | 10.5 | OFF | 5/29/2010 | OFF | 5/29/2010 |
| <b>Texas</b>          | 2.17 | 8.3  | OFF | 5/29/2010 | OFF | 5/29/2010 |
| <b>Utah</b>           | 2.83 | 7.3  | OFF | 5/29/2010 | OFF | 5/29/2010 |
| <b>Vermont</b>        | 4.01 | 6.4  | OFF | 5/29/2010 | OFF | 5/29/2010 |
| <b>Virgin Islands</b> | 1.85 | 5.2  | OFF | 5/29/2010 | OFF | 5/29/2010 |
| <b>Virginia</b>       | 1.86 | 7.2  | OFF | 5/29/2010 | OFF | 5/29/2010 |
| <b>Washington</b>     | 4.23 | 9.3  | OFF | 5/29/2010 | OFF | 5/29/2010 |
| <b>West Virginia</b>  | 3.24 | 9.2  | OFF | 5/29/2010 | OFF | 5/29/2010 |
| <b>Wisconsin</b>      | 4.79 | 8.5  | OFF | 5/29/2010 | OFF | 5/29/2010 |
| <b>Wyoming</b>        | 2.89 | 7.1  | OFF | 5/29/2010 | OFF | 5/29/2010 |

The EUC law expired June 2, 2010. Under EUC law, the last date eligibility could be established for new participants was May 22, 2010. Because EUC 2008 Trigger Notice No. 2010-24 is effective with respect to the week beginning on June 27 and ending July 03, it now shows that states have triggered “off” Third and Fourth Tier EUC since claimants ending a tier may not advance to the next tier. Under the phase-out provisions, claimants may receive their remaining entitlement for the tier in which they are collecting.

I.U.R reflects 13-week period ending June 12, 2010.

T.U.R reflects avg. seasonally adjusted T.U.R for 3-month period ending May, 2010.

Trigger Notice Report

[https://oui.doleta.gov/unemploy/trigger/2010/trig\\_072510.html](https://oui.doleta.gov/unemploy/trigger/2010/trig_072510.html)

TRIGGER NOTICE NO. 2010 - 28  
STATE EXTENDED BENEFIT (E.B.) INDICATORS UNDER P.L. 102-318  
Effective July 25, 2010

|   |   |                 | INDICATORS                                  |                                |                            |                  |                | STATUS             |                                         |
|---|---|-----------------|---------------------------------------------|--------------------------------|----------------------------|------------------|----------------|--------------------|-----------------------------------------|
|   |   |                 | 13 Weeks<br>Insured<br>Unemployment<br>Rate | Percent<br>of Prior<br>2 Years | 3 months<br>S.A.<br>T.U.R. | Percent of prior |                |                    | Periods<br>Begin Date(B)<br>End Date(E) |
|   |   |                 |                                             |                                |                            | Year             | Second<br>Year | Available<br>Weeks |                                         |
| @ |   | Alabama         | 2.72                                        | 92                             | 10.7                       | 107              | 232            | 20                 | B 03-29-2009                            |
| @ |   | Alaska          | 5.46                                        | 130                            | 8.2                        | 105              | 128            | 20                 | B 01-25-2009                            |
| @ |   | Arizona         | 3.44                                        | 115                            | 9.6                        | 104              | 181            | 20                 | B 02-22-2009                            |
|   | & | Arkansas        | 3.76                                        | 94                             | 7.7                        | 106              | 157            |                    | E 09-26-2009                            |
| @ |   | California      | 4.59                                        | 109                            | 12.4                       | 109              | 185            | 20                 | B 02-22-2009                            |
| @ |   | Colorado        | 3.20                                        | 141                            | 8.0                        | 97               | 177            | 20                 | B 04-12-2009                            |
| @ |   | Connecticut     | 4.24                                        | 111                            | 8.9                        | 108              | 167            | 20                 | B 02-15-2009                            |
| @ | * | Delaware        | 3.10                                        | 103                            | 8.8                        | 111              | 200            | 20                 | B 06-28-2009                            |
| @ |   | District of Col | 2.67                                        | 219                            | 10.4                       | 107              | 170            | 20                 | B 04-05-2009                            |
| @ | * | Florida         | 3.27                                        | 93                             | 11.7                       | 114              | 205            | 20                 | B 02-22-2009                            |
| @ | * | Georgia         | 2.95                                        | 99                             | 10.2                       | 108              | 178            | 20                 | B 02-22-2009                            |
|   | & | Hawaii          | 3.16                                        | 116                            | 6.5                        | 94               | 180            |                    | E 01-24-1981                            |
| @ |   | Idaho           | 3.91                                        | 105                            | 9.0                        | 116              | 200            | 20                 | B 02-08-2009                            |
| @ |   | Illinois        | 3.82                                        | 99                             | 10.8                       | 108              | 174            | 20                 | B 03-15-2009                            |
| @ |   | Indiana         | 2.74                                        | 77                             | 10.0                       | 95               | 188            | 20                 | B 03-15-2009                            |
|   | * | & Iowa          | 2.54                                        | 97                             | 6.8                        | 119              | 165            |                    | E 06-04-1983                            |
| @ |   | Kansas          | 2.95                                        | 109                            | 6.5                        | 92               | 154            | 13                 | B 07-05-2009                            |
| @ | * | Kentucky        | 2.87                                        | 88                             | 10.3                       | 97               | 168            | 20                 | B 02-22-2009                            |
|   | & | Louisiana       | 3.09                                        | 147                            | 6.9                        | 101              | 172            |                    | E 02-25-2006                            |
| @ |   | Maine           | 2.99                                        | 107                            | 8.0                        | 97               | 163            | 20                 | B 03-29-2009                            |
|   | & | Maryland        | 2.94                                        | 109                            | 7.3                        | 104              | 182            |                    | E 07-31-1982                            |
| @ |   | Massachusetts   | 3.68                                        | 98                             | 9.1                        | 110              | 185            | 20                 | B 03-22-2009                            |
| @ | * | Michigan        | 4.02                                        | 75                             | 13.6                       | 100              | 176            | 20                 | B 01-25-2009                            |
| @ |   | Minnesota       | 2.90                                        | 98                             | 7.0                        | 83               | 137            | 13                 | B 03-29-2009                            |
|   | & | Mississippi     | 3.58                                        | 111                            | 11.3                       | 121              | 171            |                    | E 07-16-1983                            |
| @ |   | Missouri        | 3.10                                        | 103                            | 9.3                        | 100              | 163            | 20                 | B 02-22-2009                            |
|   | & | Montana         | 4.01                                        | 121                            | 7.2                        | 120              | 167            |                    | E 06-12-2010                            |
|   | & | Nebraska        | 1.95                                        | 120                            | 4.9                        | 104              | 158            |                    | E 01-24-1981                            |
| @ |   | Nevada          | 4.78                                        | 104                            | 13.9                       | 120              | 235            | 20                 | B 02-22-2009                            |
| @ | * | New Hampshire   | 3.01                                        | 112                            | 6.3                        | 101              | 170            | 13                 | B 08-02-2009                            |
| @ |   | New Jersey      | 4.13                                        | 99                             | 9.7                        | 106              | 190            | 20                 | B 03-15-2009                            |
| @ |   | New Mexico      | 3.61                                        | 130                            | 8.4                        | 123              | 204            | 20                 | B 09-06-2009                            |
| @ |   | New York        | 3.35                                        | 103                            | 8.3                        | 98               | 169            | 20                 | B 03-29-2009                            |
| @ |   | North Carolina  | 4.24                                        | 110                            | 10.4                       | 96               | 185            | 20                 | B 10-05-2008                            |
|   | * | & North Dakota  | 1.19                                        | 97                             | 3.7                        | 84               | 123            |                    | E 06-11-1983                            |
| @ |   | Ohio            | 3.22                                        | 91                             | 10.7                       | 103              | 172            | 20                 | B 03-15-2009                            |
|   | & | Oklahoma        | 2.35                                        | 114                            | 6.7                        | 104              | 197            |                    | E 01-24-1981                            |
| @ |   | Oregon          | 5.30                                        | 104                            | 10.6                       | 91               | 185            | 20                 | B 12-07-2008                            |
| @ |   | Pennsylvania    | 4.71                                        | 100                            | 9.1                        | 113              | 182            | 20                 | B 02-15-2009                            |
| # |   | & Puerto Rico   | 6.45                                        | 116                            | 16.8                       | 113              | 152            | 13                 | B 01-25-2009                            |
| @ |   | Rhode Island    | 4.04                                        | 99                             | 12.3                       | 114              | 170            | 20                 | B 07-06-2008                            |
| @ |   | South Carolina  | 4.03                                        | 102                            | 11.1                       | 94               | 181            | 20                 | B 03-08-2009                            |
|   | * | & South Dakota  | 1.01                                        | 105                            | 4.6                        | 93               | 158            |                    | E 01-24-1981                            |
| @ |   | Tennessee       | 2.64                                        | 90                             | 10.3                       | 96               | 163            | 20                 | B 02-22-2009                            |
| @ |   | Texas           | 2.19                                        | 106                            | 8.2                        | 109              | 178            | 20                 | B 05-03-2009                            |
|   | * | & Utah          | 2.67                                        | 122                            | 7.3                        | 107              | 214            |                    | E 06-25-1983                            |
|   |   | Vermont         | 3.60                                        | 99                             | 6.2                        | 86               | 144            |                    | E 07-10-2010                            |
|   | & | Virgin Islands  | 2.06                                        | 90                             | 5.2                        | 89               | 126            |                    | E 08-06-1983                            |
| @ |   | Virginia        | 1.81                                        | 109                            | 7.1                        | 104              | 197            | 13                 | B 05-03-2009                            |
| @ | * | Washington      | 3.91                                        | 112                            | 9.1                        | 101              | 182            | 20                 | B 02-15-2009                            |
| @ |   | West Virginia   | 3.05                                        | 98                             | 8.8                        | 111              | 220            | 20                 | B 06-07-2009                            |

## Trigger Notice Report

[https://oui.doleta.gov/unemploy/trigger/2010/trig\\_072510.html](https://oui.doleta.gov/unemploy/trigger/2010/trig_072510.html)

|   |   |  |           |      |     |     |     |     |    |              |
|---|---|--|-----------|------|-----|-----|-----|-----|----|--------------|
| @ |   |  | Wisconsin | 4.41 | 102 | 8.2 | 93  | 186 | 20 | B 02-22-2009 |
| * | & |  | Wyoming   | 2.53 | 120 | 7.0 | 114 | 233 |    | E 06-13-1987 |

---

|                       |   |    |
|-----------------------|---|----|
| Total Number 'ON': 38 | 1 | 37 |
|-----------------------|---|----|

---

\* - State does not have 6 % I.U.R option in law

&amp; - State does not have T.U.R option in law

7/23/2010

@ - State "ON" by 3-month average T.U.R

# - State "ON" by 13-week I.U.R

IUR reflects 13-week period ending July 10, 2010

TUR reflects avg. seasonally adjusted TUR for 3-month period ending June, 2010

Emergency Unemployment Compensation Trigger Notice Report

[https://oui.doleta.gov/unemploy/euc\\_trigger/2010/euc\\_072510.html](https://oui.doleta.gov/unemploy/euc_trigger/2010/euc_072510.html)

EUC 2008 TRIGGER NOTICE NO. 2010 - 28  
THIRD AND FOURTH TIER EUC 2008 TRIGGERS UNDER P.L. 111-92  
Effective July 25, 2010

| State                   | 13 Weeks<br>IUR | 3 months<br>SA TUR | Tier Three<br>Status | Tier Three<br>Effective<br>Date | Tier Four<br>Status | Tier Four<br>Effective<br>Date |
|-------------------------|-----------------|--------------------|----------------------|---------------------------------|---------------------|--------------------------------|
| Alabama                 | 2.72            | 10.7               | ON                   | 11/8/2009                       | ON                  | 11/8/2009                      |
| Alaska                  | 5.62            | 8.2                | ON                   | 11/8/2009                       | OFF                 | 6/12/2010                      |
| Arizona                 | 3.42            | 9.6                | ON                   | 11/8/2009                       | ON                  | 11/8/2009                      |
| Arkansas                | 3.77            | 7.7                | ON                   | 11/8/2009                       |                     |                                |
| California              | 4.64            | 12.4               | ON                   | 11/8/2009                       | ON                  | 11/8/2009                      |
| Colorado                | 3.21            | 8.0                | ON                   | 11/8/2009                       |                     |                                |
| Connecticut             | 4.24            | 8.9                | ON                   | 11/8/2009                       | ON                  | 1/3/2010                       |
| Delaware                | 3.13            | 8.8                | ON                   | 11/8/2009                       | ON                  | 1/3/2010                       |
| District of<br>Columbia | 2.67            | 10.4               | ON                   | 11/8/2009                       | ON                  | 11/8/2009                      |
| Florida                 | 3.27            | 11.7               | ON                   | 11/8/2009                       | ON                  | 11/8/2009                      |
| Georgia                 | 2.93            | 10.2               | ON                   | 11/8/2009                       | ON                  | 11/8/2009                      |
| Hawaii                  | 3.18            | 6.5                | ON                   | 11/8/2009                       |                     |                                |
| Idaho                   | 4.04            | 9.0                | ON                   | 11/8/2009                       | ON                  | 11/8/2009                      |
| Illinois                | 3.82            | 10.8               | ON                   | 11/8/2009                       | ON                  | 11/8/2009                      |
| Indiana                 | 2.73            | 10.0               | ON                   | 11/8/2009                       | ON                  | 11/8/2009                      |
| Iowa                    | 2.58            | 6.8                | ON                   | 11/8/2009                       |                     |                                |
| Kansas                  | 2.92            | 6.5                | ON                   | 11/8/2009                       |                     |                                |
| Kentucky                | 2.91            | 10.3               | ON                   | 11/8/2009                       | ON                  | 11/8/2009                      |
| Louisiana               | 3.09            | 6.9                | ON                   | 11/8/2009                       |                     |                                |
| Maine                   | 3.08            | 8.0                | ON                   | 11/8/2009                       |                     | 1/2/2010                       |
| Maryland                | 2.94            | 7.3                | ON                   | 11/8/2009                       |                     |                                |
| Massachusetts           | 3.65            | 9.1                | ON                   | 11/8/2009                       | ON                  | 11/8/2009                      |
| Michigan                | 4.08            | 13.6               | ON                   | 11/8/2009                       | ON                  | 11/8/2009                      |
| Minnesota               | 2.98            | 7.0                | ON                   | 11/8/2009                       |                     |                                |
| Mississippi             | 3.52            | 11.3               | ON                   | 11/8/2009                       | ON                  | 11/8/2009                      |
| Missouri                | 3.11            | 9.3                | ON                   | 11/8/2009                       | ON                  | 11/8/2009                      |
| Montana                 | 4.12            | 7.2                | ON                   | 11/8/2009                       | OFF                 | 7/3/2010                       |
| Nebraska                | 1.97            | 4.9                |                      |                                 |                     |                                |
| Nevada                  | 4.84            | 13.9               | ON                   | 11/8/2009                       | ON                  | 11/8/2009                      |
| New Hampshire           | 3.07            | 6.3                | ON                   | 11/8/2009                       |                     |                                |
| New Jersey              | 4.13            | 9.7                | ON                   | 11/8/2009                       | ON                  | 11/8/2009                      |
| New Mexico              | 3.62            | 8.4                | ON                   | 11/8/2009                       | ON**                | 4/11/2010                      |
| New York                | 3.35            | 8.3                | ON                   | 11/8/2009                       | ON**                | 11/8/2009                      |
| North Carolina          | 4.31            | 10.4               | ON                   | 11/8/2009                       | ON                  | 11/8/2009                      |
| North Dakota            | 1.23            | 3.7                |                      |                                 |                     |                                |

## Emergency Unemployment Compensation Trigger Notice Report

[https://oui.doleta.gov/unemploy/euc\\_trigger/2010/euc\\_072510.html](https://oui.doleta.gov/unemploy/euc_trigger/2010/euc_072510.html)

|                       |      |      |    |           |      |           |
|-----------------------|------|------|----|-----------|------|-----------|
| <b>Ohio</b>           | 3.21 | 10.7 | ON | 11/8/2009 | ON   | 11/8/2009 |
| <b>Oklahoma</b>       | 2.35 | 6.7  | ON | 11/8/2009 |      |           |
| <b>Oregon</b>         | 5.38 | 10.6 | ON | 11/8/2009 | ON   | 11/8/2009 |
| <b>Pennsylvania</b>   | 4.73 | 9.1  | ON | 11/8/2009 | ON   | 11/8/2009 |
| <b>Puerto Rico</b>    | 6.42 | 16.8 | ON | 11/8/2009 | ON   | 11/8/2009 |
| <b>Rhode Island</b>   | 4.06 | 12.3 | ON | 11/8/2009 | ON   | 11/8/2009 |
| <b>South Carolina</b> | 4.04 | 11.1 | ON | 11/8/2009 | ON   | 11/8/2009 |
| <b>South Dakota</b>   | 1.05 | 4.6  |    |           |      |           |
| <b>Tennessee</b>      | 2.64 | 10.3 | ON | 11/8/2009 | ON   | 11/8/2009 |
| <b>Texas</b>          | 2.19 | 8.2  | ON | 11/8/2009 |      |           |
| <b>Utah</b>           | 2.71 | 7.3  | ON | 11/8/2009 |      |           |
| <b>Vermont</b>        | 3.70 | 6.2  | ON | 11/8/2009 |      |           |
| <b>Virgin Islands</b> | 1.88 | 5.2  | 0  | 1/0/1900  |      |           |
| <b>Virginia</b>       | 1.82 | 7.1  | ON | 11/8/2009 |      |           |
| <b>Washington</b>     | 3.99 | 9.1  | ON | 11/8/2009 | ON   | 11/8/2009 |
| <b>West Virginia</b>  | 3.09 | 8.8  | ON | 11/8/2009 | ON   | 11/8/2009 |
| <b>Wisconsin</b>      | 4.50 | 8.2  | ON | 11/8/2009 | ON** | 4/11/2010 |
| <b>Wyoming</b>        | 2.62 | 7.0  | ON | 11/8/2009 |      |           |

All states are eligible for up to 34 weeks of First and Second Tier benefits.

49 states are eligible for up to 13 weeks of Third Tier benefits as of July 25, 2010.

28 states are eligible for up to 6 weeks of Fourth Tier benefits as of July 25, 2010.

I.U.R reflects 13-week period ending July 10, 2010.

T.U.R reflects avg. seasonally adjusted T.U.R for 3-month period ending June, 2010.

\* The effective date represents the date a state can begin making payments to claimants, and not the date a state met trigger criteria to be "on" in any tier of benefits.

\*\* these states will end their period August 14, 2010

## References

- Fujita, Shigeru. 2010. Economic Effects of the Unemployment Insurance Benefit. *Business Review Q4*. Available online: <https://www.philadelphiafed.org/the-economy/macroeconomics/economic-effects-of-the-unemployment-insurance-benefit> (accessed on 27 September 2023).
- Rothstein, Jesse. 2011. Unemployment insurance and job search in the great recession. *Brookings Papers on Economic Activity* 42: 143–96.
- Whittaker, Julie M., and Katelin P. Isaacs. 2014. *Extending Unemployment Compensation Benefits during Recessions*. Technical Report, Congressional Research Service Report RL34340. Washington, DC: Congressional Research Service.
